# Supplementary material for: Modulation of Inflammatory Reactions by Low-Dose Ionizing Radiation: Cytokine Release of Murine Endothelial Cells Is Dependent on Culture Conditions
Source: Hindawi journal article supplement (doi:10.1155/2018/2856518), 2018-06-03

Supplement Figure 1

Metabolic activity after irradiation

A) Cells without TNF-α treatment

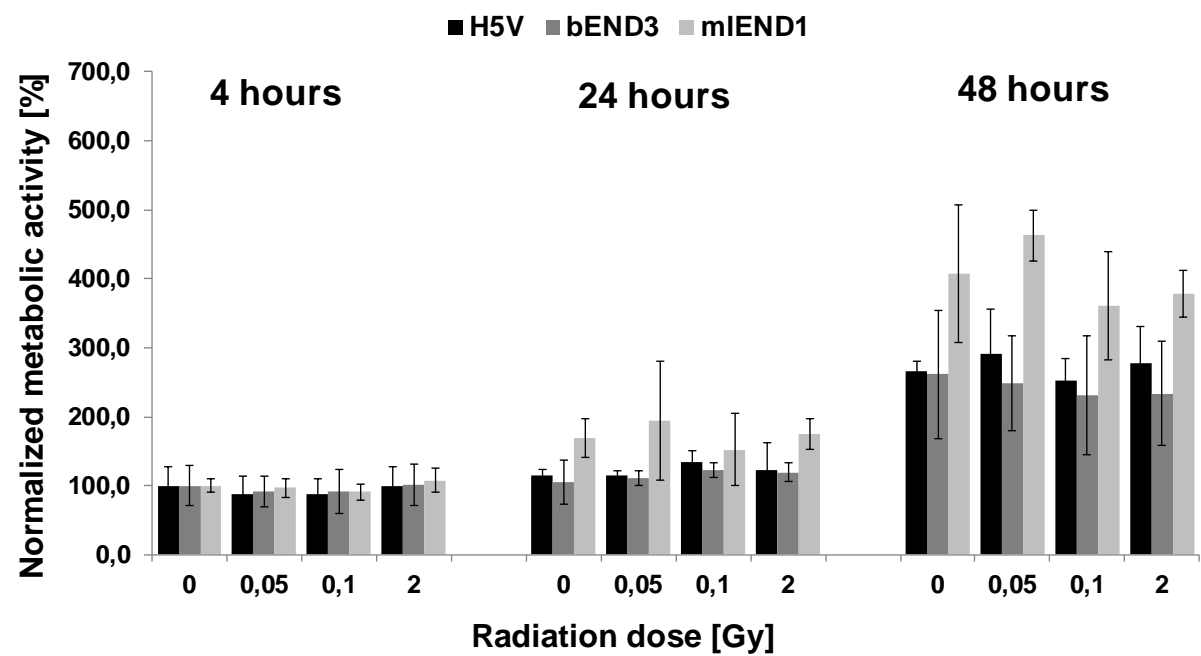

B) Cells with TNF-α treatment

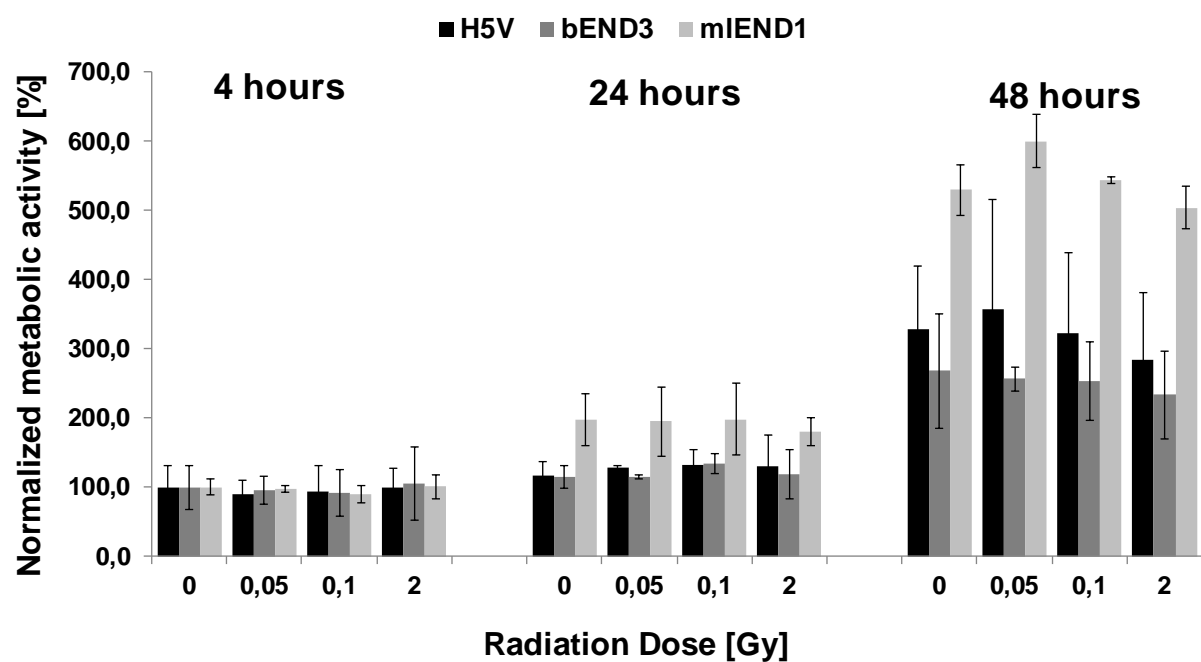

Supplement Figure 2

Release of KC after irradiation

A) mIEND.1 endothelial cells

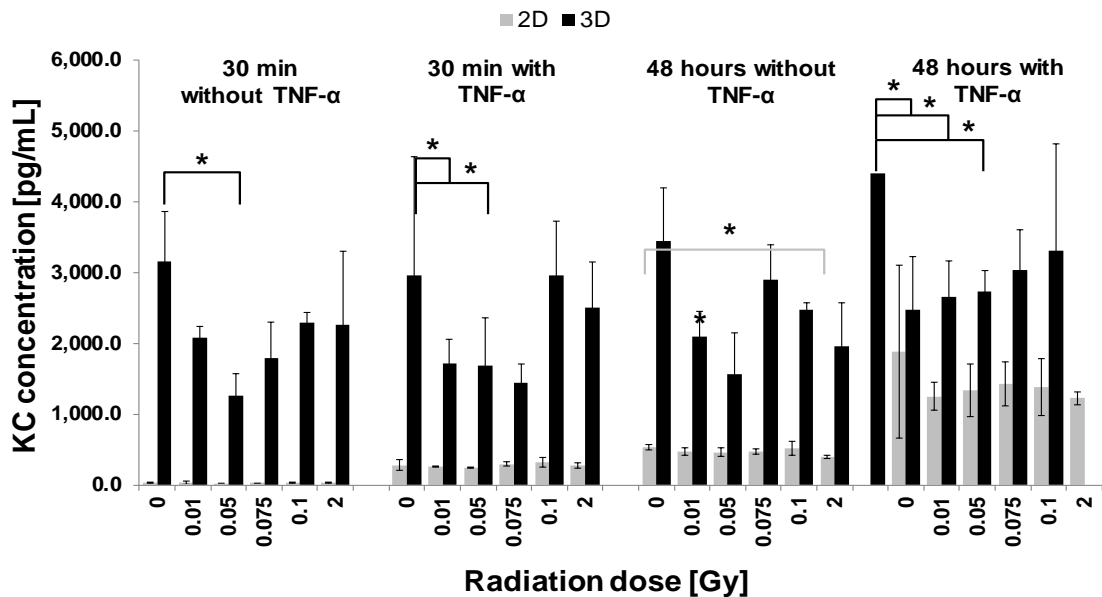

B) bEND.3 endothelial cells

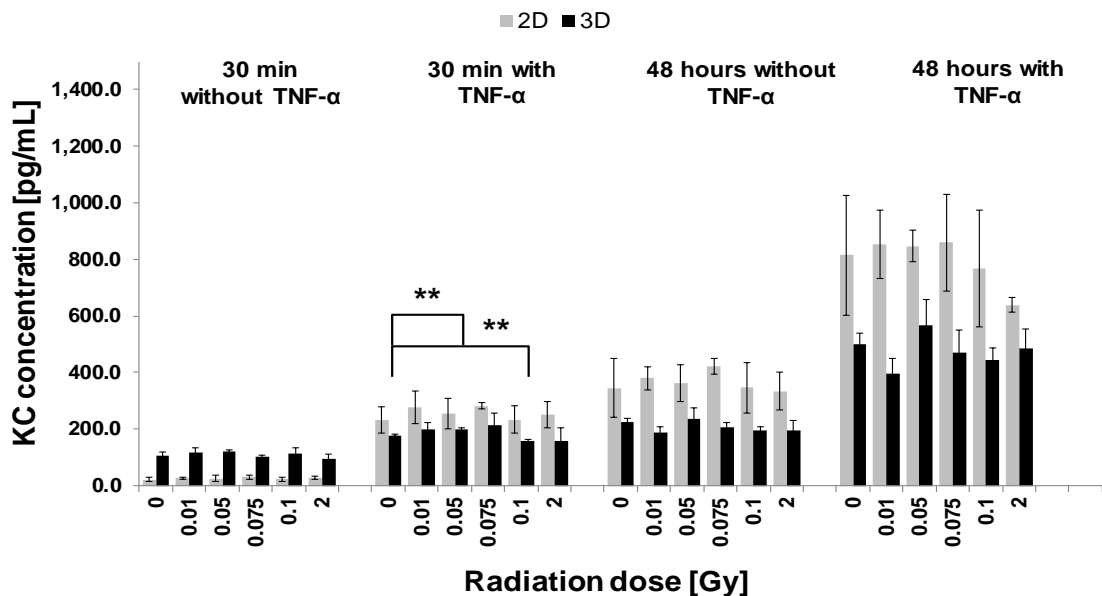

Supplement Figure 3

Release of MCP-1 after irradiation

A) H5V endothelial cells

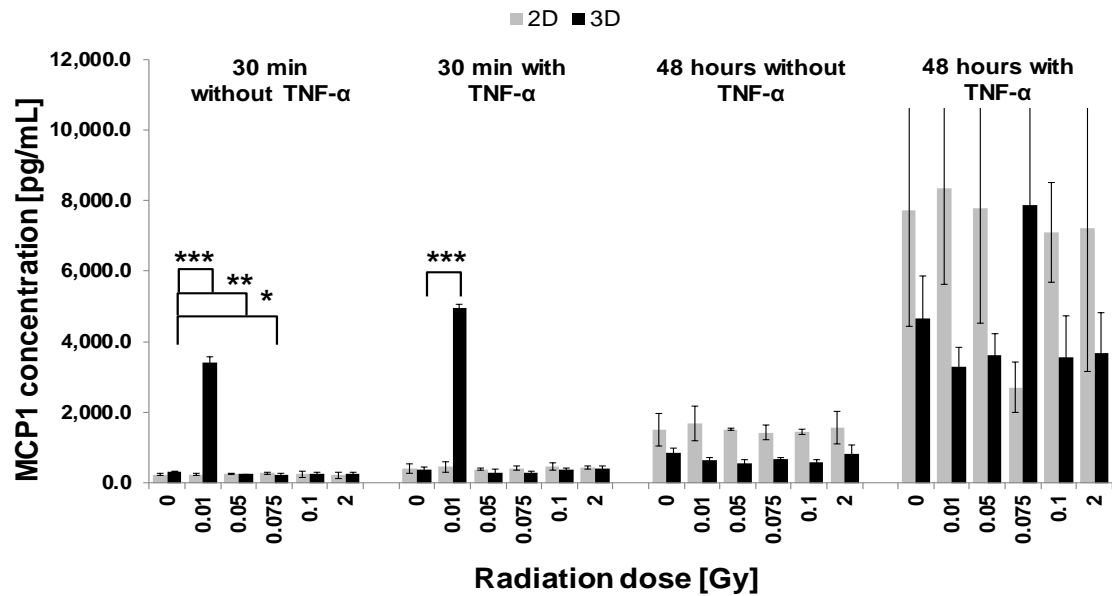

B) mIEND.1 endothelial cells

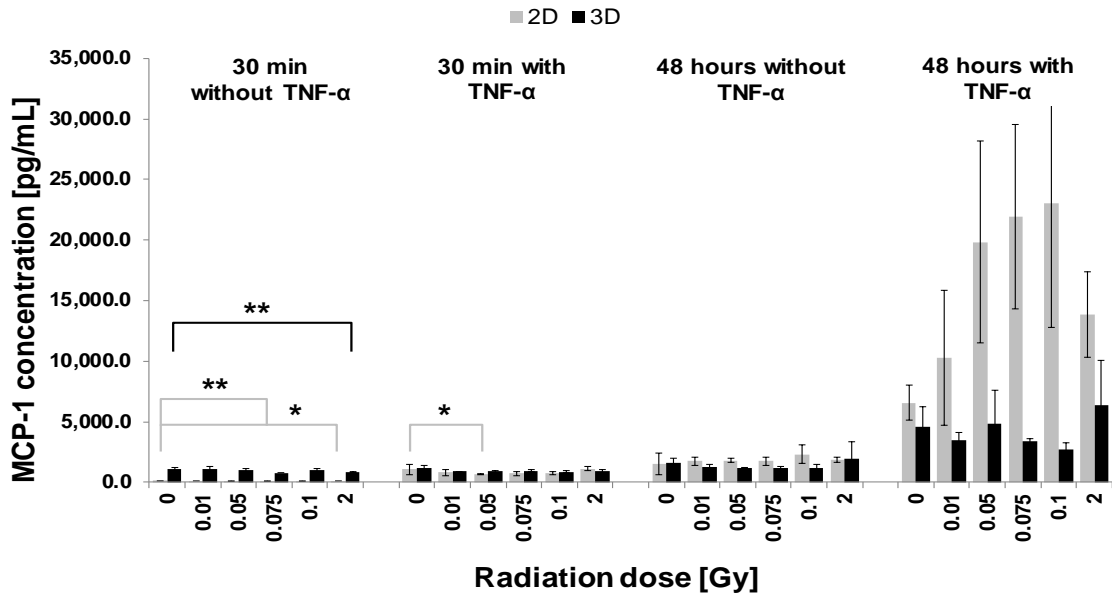

Supplement Figure 4

Release of RANTES after irradiation

A) H5V endothelial cells

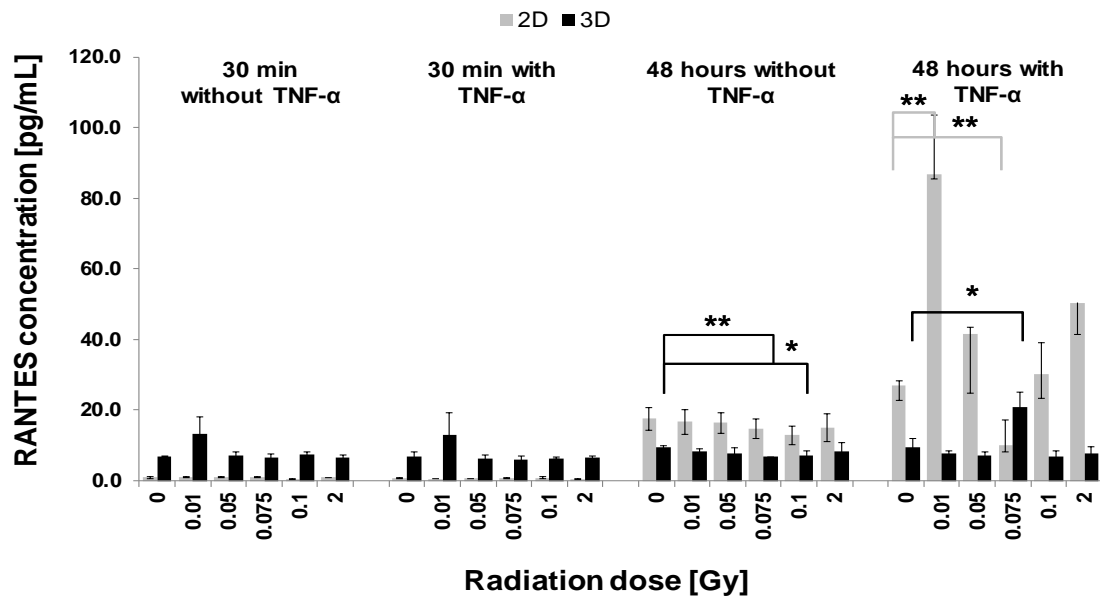

B) bEND.3 endothelial cells

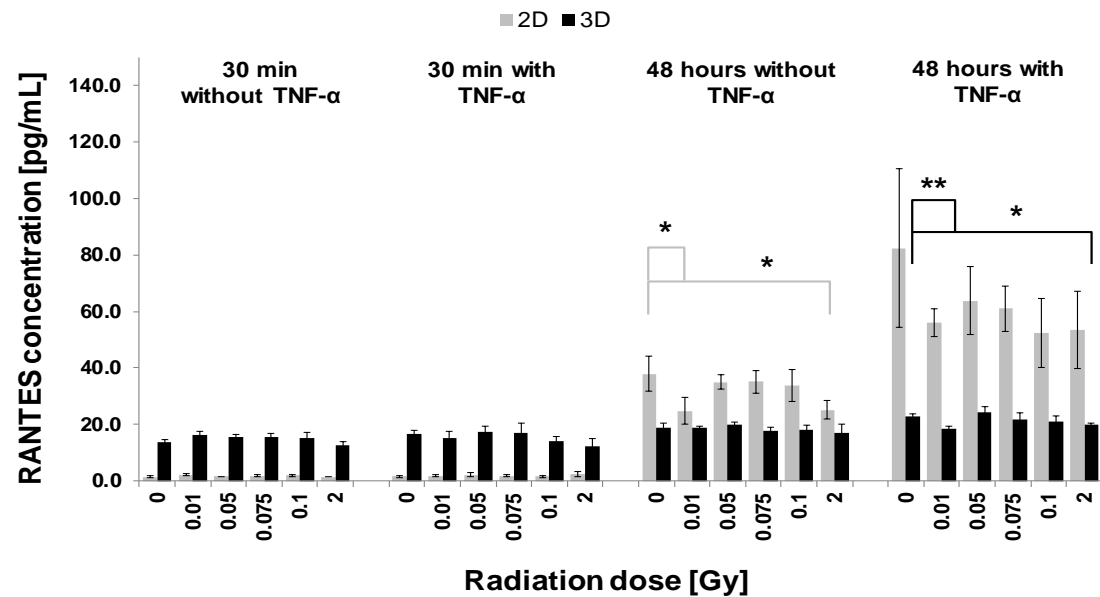

Supplement Figure 5

Release of G-CSF after irradiation

A) 2D

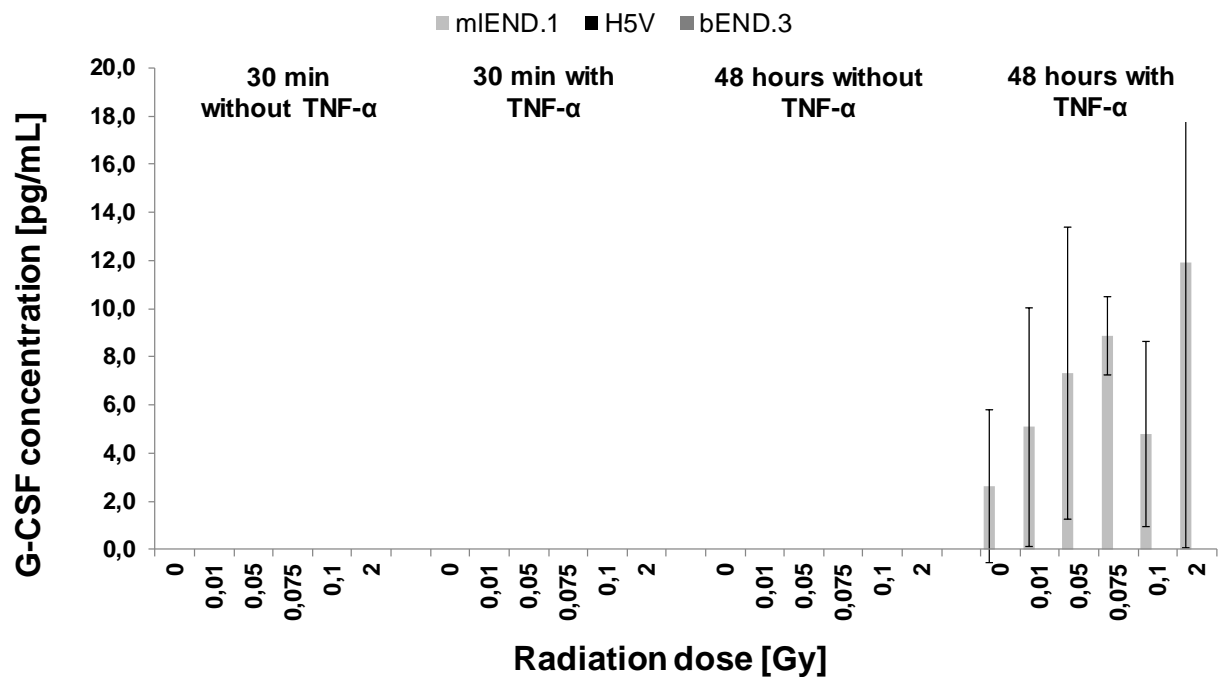

B) 3D

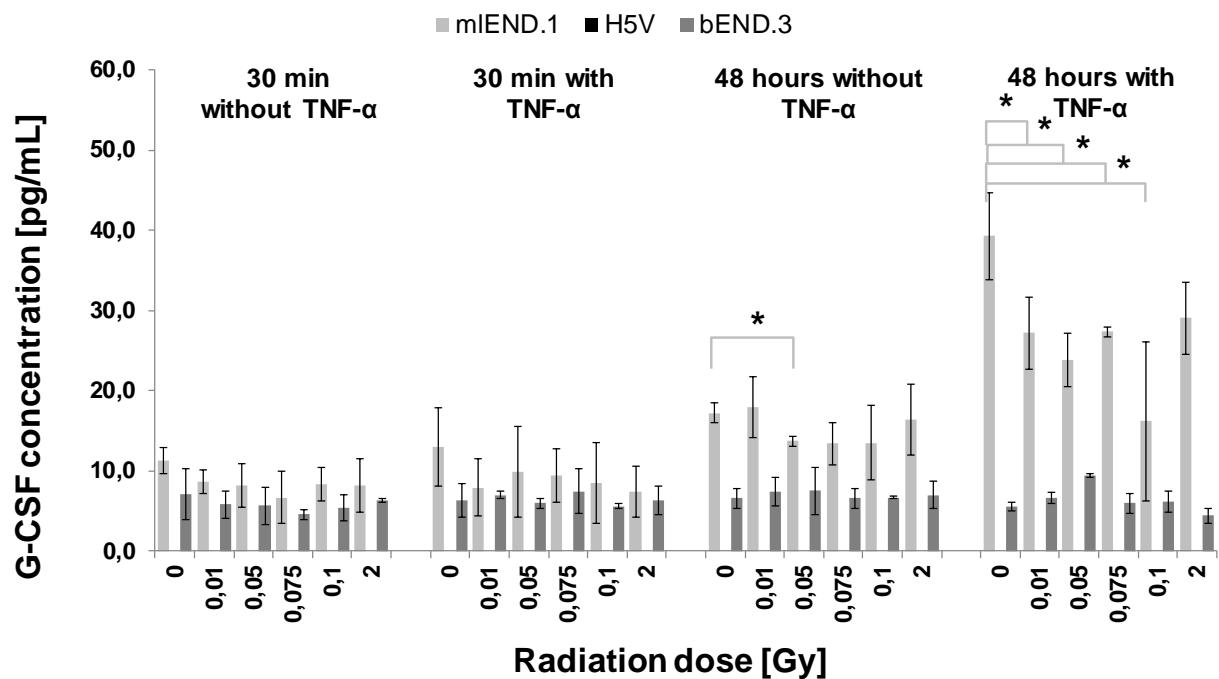

Supplement: f1 [file 2856518.f1.pdf]
